# Supplementary material for: Breastfeeding and vitamin D supplementation reduce the risk of Kawasaki disease in a German population-based case-control study
Source: PubMed Central journal article supplement (PMC6390341; doi:10.1186/s12887-019-1438-2), 2019-02-26
Supplement: 12887_2019_1438_MOESM1_ESM.pdf [file 12887_2019_1438_MOESM1_ESM.pdf]

**Diagnostic Criteria**

| Laboratory values :        | Not determined        | Value      | Date (dd.mm.jjjj) |
|----------------------------|-----------------------|------------|-------------------|
| Albumin                    | <input type="radio"/> | g/dl       |                   |
| Alanine Aminotransaminase  | <input type="radio"/> | U/l        |                   |
| Aspartate Aminotransferase | <input type="radio"/> | U/l        |                   |
| CRP                        | <input type="radio"/> | mg/l       |                   |
| Thrombocytes               | <input type="radio"/> | T/ $\mu$ l |                   |
| Haemoglobin                | <input type="radio"/> | g/dl       |                   |
| Leukocytes                 | <input type="radio"/> | T/ $\mu$ l |                   |

Leukocyturia  Not determined  No  Yes Date: |\_\_| |\_\_| |\_\_| | (dd / mm / jjjj)

ESR: \_\_\_\_/\_\_\_\_ (mm/h), Date: |\_\_| |\_\_| |\_\_| | (dd / mm / jjjj)

**Echocardiography:**  No  Yes, Date: |\_\_| |\_\_| |\_\_| | (dd / mm / jjjj)

Coronary aneurysm: Yes/ No Diameter: \_\_\_\_\_ mm

LCA: \_\_\_\_\_ LAD: \_\_\_\_\_ LCX: \_\_\_\_\_ RCA: \_\_\_\_\_

**Therapy**

**ASS** (Initial: high-dose): Dose: \_\_\_\_\_ mg/kg body weight/d Start: |\_\_| |\_\_| |\_\_| | (dd / mm / jjjj)

(Duration: low-dose): Dose: \_\_\_\_\_ mg/kg body weight/d Start: |\_\_| |\_\_| |\_\_| | Duration \_\_\_\_ weeks

**Intravenous Immunoglobulin (IVIG):** Total amount. \_\_\_\_  No IVIG, because: \_\_\_\_\_

1st Dose: Dose: \_\_\_\_\_ g/kg body weight/d, Date |\_\_| |\_\_| |\_\_| | (dd / mm / jjjj)

2nd Dose: Dose: \_\_\_\_\_ g/kg body weight/d, Date |\_\_| |\_\_| |\_\_| | (dd / mm / jjjj)

Following: Dose: \_\_\_\_\_ g/kg body weight/d, Date |\_\_| |\_\_| |\_\_| | Dose: \_\_\_\_\_ g/kg body weight/d, Date |\_\_| |\_\_| |\_\_| |

**Steroids:** for KD treatment  Yes  No, for other reasons: \_\_\_\_\_

Name: \_\_\_\_\_ Dose: \_\_\_\_\_ Start: |\_\_| |\_\_| |\_\_| | Duration \_\_\_\_\_ Days

**OUTCOME**

Cure  Recurrence: \_\_\_\_ (Number)  Deceased: \_\_\_\_\_ (Date)

THANK YOU FOR YOUR SUPPORT
