# Supplementary material for: Breastfeeding and vitamin D supplementation reduce the risk of Kawasaki disease in a German population-based case-control study
Source: Springer Nature journal article supplement (doi:10.1186/s12887-019-1438-2), 2019-02-26
Supplement: MOESM2 [file 16510002]

# Questionnaire Kawasaki Disease

## Perinatal risk factors

Attention: The questionnaire cannot be cached.

It will take approximately 10 minutes:

ESPED Nr.: \_\_\_\_\_

## Characteristics of perinatal period

---

- Duration of pregnancy (in weeks): \_\_\_\_\_  
*e.g.: 38+2 = 38 weeks plus 2 days (please document 39)*  
*e.g.: 1 week longer = 41 weeks (please document 41)*
- Birth weight (in gramm)
- Parturition?
  - Cesarean Section
  - Vaginal
- How long did you breastfeed your child?
  - < 2 weeks
  - > 2 weeks

- Vitamin D supplementation in the 1st year of life?
  - Yes
  - No
- How long did you supplement Vitamin D (in months): \_\_\_\_\_
- How often did you supplement vitamin D?
  - Daily
  - Every second day
  - Not on a daily basis

## Family and Environment

---

- Who is doing a vegetarian diet?
  - None
  - Mother
  - Father
  - Child
- Did you have pets (during the acute phase of the child suffering from Kawasaki Disease)
  - Yes
  - No

If yes, which kind of: \_\_\_\_\_

- Number of persons in household (during the acute phase of the child suffering from Kawasaki Disease): \_\_\_\_\_
- Number of children (at the time of suffering from Kawasaki Disease): \_\_\_\_\_
- Living space in m<sup>2</sup> (at the time of suffering from Kawasaki Disease): \_\_\_\_\_

- Do you have any additional remarks: \_\_\_\_\_

End

---

Thank you for your time and your support!
